# Supplementary material for: “Seed-Milarity” Confers to hsa-miR-210 and hsa-miR-147b Similar Functional Activity
Source: PLoS One. 2012 Sep 13;7(9):e44919. doi: 10.1371/journal.pone.0044919 (PMC3441733; doi:10.1371/journal.pone.0044919)
Supplement: Table S5 — Association of microRNAs and miRBase family with each human seed. In miRBase v16, 872 distinct seed sequences were found in human microRNA. For each seed, the number of microRNA having this seed is reported (count_mirna) along with the number and names of microRNA having this seed in the 5′ arm (count_mirna_5p, mirna_5p) or the 3′ arm (count_mirna_3p, mirna_3p). For each seed and each arm side, the number and names miRBase families are displayed (count_fam_5p, count_fam_3p, fam_5p, fam_3p). The total number of distinct miRBase families for each seed is also displayed (count_fam). (XLSX) [file pone.0044919.s011.xlsx]

## Sheet: Feuil1
seed	count_mirna	count_mirna_5p	count_mirna_3p	count_fam	count_fam_5p	count_fam_3p	mirna_5p	fam_5p	mirna_3p	fam_3p
AAAAAC	3	0	3	1	0	1			hsa-miR-548d-3p hsa-miR-548x hsa-miR-548z	mir-548
AAAAAU	1	0	1	1	0	1			hsa-miR-548c-3p	mir-548
AAAACC	1	0	1	1	0	1			hsa-miR-548aa	mir-548
AAAACG	1	1	0	1	1	0	hsa-miR-424*	mir-322
AAAACU	3	0	3	1	0	1			hsa-miR-548a-3p hsa-miR-548e hsa-miR-548f	mir-548
AAAAGU	2	2	0	1	1	0	hsa-miR-548n hsa-miR-548t	mir-548
AAAAUG	1	0	1	1	0	1			hsa-miR-3662	0
AAAAUU	1	0	1	1	0	1			hsa-miR-4282	0
AAACCA	1	0	1	1	0	1			hsa-miR-497*	mir-497
AAACCG	1	0	1	1	0	1			hsa-miR-1537	mir-1537
AAACGG	1	1	0	1	1	0	hsa-miR-553	mir-553
AAACUG	1	0	1	1	0	1			hsa-miR-548g	mir-548
AAAGAA	2	2	0	2	2	0	hsa-miR-186 hsa-miR-3133	mir-186 0
AAAGAC	1	0	1	1	0	1			hsa-miR-548u	mir-548
AAAGAG	3	3	0	3	3	0	hsa-miR-583 hsa-miR-1276 hsa-miR-4311	mir-583 mir-1276 0
AAAGCG	5	0	5	1	0	1			hsa-miR-518f hsa-miR-518b hsa-miR-518c hsa-miR-518a-3p hsa-miR-518d-3p	mir-515
AAAGCU	5	1	4	2	1	1	hsa-miR-320b	mir-320	hsa-miR-320a hsa-miR-320c hsa-miR-320b hsa-miR-320d	mir-320
AAAGGU	1	1	0	1	1	0	hsa-miR-548m	mir-548
AAAGUA	12	12	0	2	2	0	hsa-miR-559 hsa-miR-548b-5p hsa-miR-548a-5p hsa-miR-548c-5p hsa-miR-548d-5p hsa-miR-548j hsa-miR-548k hsa-miR-548l hsa-miR-548h hsa-miR-548i hsa-miR-548w hsa-miR-548y	mir-559 mir-548
AAAGUG	9	6	3	3	1	2	hsa-miR-17 hsa-miR-20a hsa-miR-93 hsa-miR-106a hsa-miR-106b hsa-miR-20b	mir-17	hsa-miR-526b* hsa-miR-519d hsa-miR-3609	mir-515 0
AAAGUU	1	0	1	1	0	1			hsa-miR-561	mir-561
AAAUAG	1	0	1	1	0	1			hsa-miR-3121	0
AAAUCA	1	1	0	1	1	0	hsa-miR-551b*	mir-551
AAAUCC	1	1	0	1	1	0	hsa-miR-605	mir-605
AAAUGA	1	0	1	1	0	1			hsa-miR-3646	0
AAAUGG	2	0	2	2	0	2			hsa-miR-224* hsa-miR-522	mir-224 mir-515
AAAUUC	1	0	1	1	0	1			hsa-miR-10a*	mir-10
AAAUUU	1	0	1	1	0	1			hsa-miR-513a-3p	mir-506
AACAAA	3	0	3	2	0	2			hsa-miR-7-1* hsa-miR-7-2* hsa-miR-495	mir-7 mir-329
AACACC	1	0	1	1	0	1			hsa-miR-21*	mir-21
AACACU	2	0	2	1	0	1			hsa-miR-141 hsa-miR-200a	mir-8
AACAGU	2	0	2	1	0	1			hsa-miR-212 hsa-miR-132	mir-132
AACAUU	1	0	1	1	0	1			hsa-miR-543	mir-329
AACCCA	1	1	0	1	1	0	hsa-miR-1273d	mir-1273
AACCGU	1	1	0	1	1	0	hsa-miR-451	mir-451
AACCUG	2	0	2	2	0	2			hsa-miR-490-3p hsa-miR-649	mir-490 mir-649
AACGCA	1	0	1	1	0	1			hsa-miR-3912	0
AACGCC	1	0	1	1	0	1			hsa-miR-614	mir-614
AACGCG	1	0	1	1	0	1			hsa-miR-523	mir-515
AACGGA	1	1	0	1	1	0	hsa-miR-191	mir-191
AACGGC	1	1	0	1	1	0	hsa-miR-337-5p	mir-337
AACUAC	1	0	1	1	0	1			hsa-miR-606	mir-606
AACUAG	1	0	1	1	0	1			hsa-miR-708*	mir-708
AACUCU	1	1	0	1	1	0	hsa-miR-618	mir-618
AACUGG	1	0	1	1	0	1			hsa-miR-582-3p	mir-582
AAGAAC	1	0	1	1	0	1			hsa-miR-548b-3p	mir-548
AAGACA	2	2	0	2	2	0	hsa-miR-641 hsa-miR-3617	mir-641 0
AAGACC	1	1	0	1	1	0	hsa-miR-3667-5p	0
AAGAUC	1	1	0	1	1	0	hsa-miR-3156	mir-3156
AAGCGC	1	0	1	1	0	1			hsa-miR-518e	mir-515
AAGCUC	2	0	2	1	0	1			hsa-miR-99a* hsa-miR-99b*	mir-99
AAGCUG	1	0	1	1	0	1			hsa-miR-320e	mir-320
AAGCUU	1	0	1	1	0	1			hsa-miR-100*	mir-99
AAGGAG	1	0	1	1	0	1			hsa-miR-3173	0
AAGGAU	1	1	0	1	1	0	hsa-miR-541*	mir-541
AAGGCA	4	1	3	4	1	3	hsa-miR-3714	0	hsa-miR-124 hsa-miR-506 hsa-miR-3910	mir-124 mir-506 mir-3910
AAGGCG	2	0	2	1	0	1			hsa-miR-525-3p hsa-miR-524-3p	mir-515
AAGGGG	1	0	1	1	0	1			hsa-miR-3936	0
AAGGUG	2	2	0	1	1	0	hsa-miR-18a hsa-miR-18b	mir-17
AAGUAG	1	0	1	1	0	1			hsa-miR-562	mir-562
AAGUCA	1	1	0	1	1	0	hsa-miR-224	mir-224
AAGUCU	1	0	1	1	0	1			hsa-miR-1264	mir-95
AAGUGC	15	1	14	5	1	4	hsa-miR-302e	mir-302_2	hsa-miR-302a hsa-miR-302b hsa-miR-302c hsa-miR-302d hsa-miR-372 hsa-miR-373 hsa-miR-520e hsa-miR-519c-3p hsa-miR-520a-3p hsa-miR-519b-3p hsa-miR-520b hsa-miR-520c-3p hsa-miR-520d-3p hsa-miR-519a	mir-302 mir-290 mir-373 mir-515
AAGUGU	1	0	1	1	0	1			hsa-miR-595	mir-595
AAGUUC	1	1	0	1	1	0	hsa-miR-148a*	mir-148
AAGUUG	1	1	0	1	1	0	hsa-miR-382	mir-154
AAUACU	3	0	3	1	0	1			hsa-miR-200b hsa-miR-200c hsa-miR-429	mir-8
AAUCAC	1	0	1	1	0	1			hsa-miR-34b	mir-34
AAUCAG	1	0	1	1	0	1			hsa-miR-34a*	mir-34
AAUCCU	1	1	0	1	1	0	hsa-miR-500a	mir-500
AAUCGG	1	0	1	1	0	1			hsa-miR-3610	0
AAUCUC	2	2	0	1	1	0	hsa-miR-216a hsa-miR-216b	mir-216
AAUGCC	1	0	1	1	0	1			hsa-miR-365	mir-365
AAUGUU	2	0	2	2	0	2			hsa-miR-33a* hsa-miR-409-3p	mir-33 mir-154
AAUUAU	1	0	1	1	0	1			hsa-miR-944	mir-944
AAUUGC	1	0	1	1	0	1			hsa-miR-302f	mir-302
AAUUUA	1	0	1	1	0	1			hsa-miR-32*	mir-32
AAUUUU	1	0	1	1	0	1			hsa-miR-590-3p	mir-590
ACAAGG	1	0	1	1	0	1			hsa-miR-624	mir-624
ACAAUA	1	1	0	1	1	0	hsa-miR-338-5p	mir-338
ACACAC	3	0	3	3	0	3			hsa-miR-362-3p hsa-miR-329 hsa-miR-603	mir-362 mir-329 mir-548
ACACGG	1	1	0	1	1	0	hsa-miR-602	mir-602
ACAGCA	1	0	1	1	0	1			hsa-miR-3120	mir-214
ACAGGU	1	0	1	1	0	1			hsa-miR-552	mir-552
ACAGUA	2	0	2	2	0	2			hsa-miR-101 hsa-miR-144	mir-101 mir-144
ACAUAG	1	0	1	1	0	1			hsa-miR-376c	mir-368
ACAUCA	1	0	1	1	0	1			hsa-miR-499-3p	mir-499
ACAUUA	1	0	1	1	0	1			hsa-miR-323-3p	mir-154
ACAUUC	5	4	1	2	1	1	hsa-miR-181a hsa-miR-181b hsa-miR-181c hsa-miR-181d	mir-181	hsa-miR-4262	0
ACCACA	1	0	1	1	0	1			hsa-miR-140-3p	mir-140
ACCAGC	1	0	1	1	0	1			hsa-miR-634	mir-634
ACCAGG	1	0	1	1	0	1			hsa-miR-1911*	0
ACCAUC	1	0	1	1	0	1			hsa-miR-181c*	mir-181
ACCCAG	2	1	1	2	1	1	hsa-miR-3130-5p	mir-3130	hsa-miR-1912	mir-1912
ACCCAU	1	1	0	1	1	0	hsa-miR-660	mir-188
ACCCGG	1	0	1	1	0	1			hsa-miR-941	mir-941
ACCCGU	3	3	0	1	1	0	hsa-miR-99a hsa-miR-100 hsa-miR-99b	mir-99
ACCCUG	2	2	0	1	1	0	hsa-miR-10a hsa-miR-10b	mir-10
ACCUGG	1	0	1	1	0	1			hsa-miR-619	mir-619
ACCUUG	1	0	1	1	0	1			hsa-miR-3200-3p	0
ACGCAC	1	0	1	1	0	1			hsa-miR-521	mir-515
ACGCCA	1	0	1	1	0	1			hsa-miR-122*	mir-122
ACGCGC	1	0	1	1	0	1			hsa-miR-3939	0
ACGCUC	1	0	1	1	0	1			hsa-miR-574-3p	mir-574
ACGUAG	1	0	1	1	0	1			hsa-miR-1277	mir-467
ACGUCA	1	0	1	1	0	1			hsa-miR-598	mir-598
ACUAGA	1	0	1	1	0	1			hsa-miR-28-3p	mir-28
ACUAGU	1	0	1	1	0	1			hsa-miR-3923	0
ACUAUA	1	0	1	1	0	1			hsa-miR-625*	mir-625
ACUCAA	1	1	0	1	1	0	hsa-miR-888	mir-743
ACUCAC	1	1	0	1	1	0	hsa-miR-3680	0
ACUCAG	2	2	0	1	1	0	hsa-miR-512-5p hsa-miR-510	mir-506
ACUCCA	1	1	0	1	1	0	hsa-miR-508-5p	mir-506
ACUCUG	1	1	0	1	1	0	hsa-miR-3664	0
ACUGAC	1	0	1	1	0	1			hsa-miR-888*	mir-743
ACUGCA	3	3	0	2	2	0	hsa-miR-217 hsa-miR-509-5p hsa-miR-509-3-5p	mir-217 mir-506
ACUGGA	2	1	1	2	1	1	hsa-miR-1243	0	hsa-miR-3654	0
ACUGGC	3	0	3	2	0	2			hsa-miR-193a-3p hsa-miR-193b hsa-miR-892b	mir-193 mir-743
ACUGUA	1	0	1	1	0	1			hsa-miR-1183	mir-1183
ACUGUG	2	0	2	2	0	2			hsa-miR-892a hsa-miR-4318	mir-743 0
ACUGUU	1	1	0	1	1	0	hsa-miR-452	mir-452
ACUUGG	1	1	0	1	1	0	hsa-miR-890	mir-743
AGAAGG	1	0	1	1	0	1			hsa-miR-3154	0
AGACGG	1	1	0	1	1	0	hsa-miR-483-5p	mir-483
AGAGAA	2	1	1	2	1	1	hsa-miR-3925	0	hsa-miR-3123	0
AGAGCA	1	1	0	1	1	0	hsa-miR-2278	0
AGAGGA	2	2	0	1	1	0	hsa-miR-3125 hsa-miR-3916	0
AGAGUU	1	1	0	1	1	0	hsa-let-7c*	let-7
AGAUAA	1	1	0	1	1	0	hsa-miR-577	mir-577
AGAUGU	1	0	1	1	0	1			hsa-miR-576-3p	mir-576
AGCAAA	1	0	1	1	0	1			hsa-miR-548p	mir-548
AGCAAU	2	2	0	1	1	0	hsa-miR-3908 hsa-miR-3942	0
AGCACC	3	0	3	1	0	1			hsa-miR-29a hsa-miR-29b hsa-miR-29c	mir-29
AGCAGC	7	6	1	4	3	1	hsa-miR-15a hsa-miR-16 hsa-miR-15b hsa-miR-195 hsa-miR-497 hsa-miR-503	mir-15 mir-497 mir-503	hsa-miR-646	mir-646
AGCAGU	1	0	1	1	0	1			hsa-miR-4274	0
AGCAUU	1	1	0	1	1	0	hsa-miR-1179	mir-1179
AGCCAC	1	0	1	1	0	1			hsa-miR-449b*	mir-449
AGCCAG	1	0	1	1	0	1			hsa-miR-575	mir-575
AGCCCC	2	1	1	2	1	1	hsa-miR-3943	0	hsa-miR-4323	0
AGCCCG	1	0	1	1	0	1			hsa-miR-3940	0
AGCCCU	2	0	2	1	0	1			hsa-miR-129* hsa-miR-129-3p	mir-129
AGCCUG	2	1	1	2	1	1	hsa-miR-596	mir-596	hsa-miR-4293	0
AGCCUU	1	0	1	1	0	1			hsa-miR-3614-3p	0
AGCUGC	1	0	1	1	0	1			hsa-miR-22	mir-22
AGCUUA	2	2	0	2	2	0	hsa-miR-21 hsa-miR-590-5p	mir-21 mir-590
AGGAAC	1	0	1	1	0	1			hsa-miR-3914	mir-3914
AGGACA	1	0	1	1	0	1			hsa-miR-1197	mir-379
AGGACU	1	1	0	1	1	0	hsa-miR-3169	0
AGGAGC	3	3	0	3	3	0	hsa-miR-28-5p hsa-miR-708 hsa-miR-3139	mir-28 mir-708 0
AGGAUG	1	1	0	1	1	0	hsa-miR-1265	mir-1265
AGGAUU	1	1	0	1	1	0	hsa-miR-3159	0
AGGCAC	1	1	0	1	1	0	hsa-miR-3622a-5p	mir-3622
AGGCAG	3	2	1	3	2	1	hsa-miR-34b* hsa-miR-449c	mir-34 mir-449	hsa-miR-940	mir-940
AGGCCA	1	0	1	1	0	1			hsa-miR-15a*	mir-15
AGGCCU	1	0	1	1	0	1			hsa-miR-3142	0
AGGCGU	1	1	0	1	1	0	hsa-miR-3186-5p	0
AGGCUG	1	0	1	1	0	1			hsa-miR-3929	0
AGGGAG	1	0	1	1	0	1			hsa-miR-1321	0
AGGGCG	1	1	0	1	1	0	hsa-miR-3141	0
AGGGCU	1	0	1	1	0	1			hsa-miR-3158	mir-3158
AGGGUC	1	0	1	1	0	1			hsa-miR-1182	mir-1182
AGGGUU	1	0	1	1	0	1			hsa-miR-296-3p	mir-296
AGGUAG	3	2	1	2	1	1	hsa-miR-196a hsa-miR-196b	mir-196	hsa-miR-3927	0
AGGUCG	1	0	1	1	0	1			hsa-miR-431*	mir-431
AGGUUA	1	1	0	1	1	0	hsa-miR-154	mir-154
AGUAAC	1	1	0	1	1	0	hsa-miR-802	mir-802
AGUACC	1	1	0	1	1	0	hsa-miR-624*	mir-624
AGUACU	1	0	1	1	0	1			hsa-miR-1278	mir-1278
AGUAGA	1	1	0	1	1	0	hsa-miR-411	mir-379
AGUAGU	1	0	1	1	0	1			hsa-miR-1244	mir-1244
AGUCCC	1	1	0	1	1	0	hsa-miR-2114	0
AGUGAG	1	1	0	1	1	0	hsa-miR-3174	0
AGUGAU	1	0	1	1	0	1			hsa-miR-1245	mir-1245
AGUGCA	7	2	5	3	1	2	hsa-miR-4295 hsa-miR-3666	0	hsa-miR-130a hsa-miR-301a hsa-miR-130b hsa-miR-454 hsa-miR-301b	mir-130 mir-454
AGUGCC	4	0	4	3	0	3			hsa-miR-371-3p hsa-miR-515-3p hsa-miR-519e hsa-miR-33b*	mir-290 mir-515 mir-33
AGUGCU	2	0	2	2	0	2			hsa-miR-512-3p hsa-miR-520f	mir-506 mir-515
AGUGGA	1	1	0	1	1	0	hsa-miR-3681	0
AGUGGU	1	1	0	1	1	0	hsa-miR-140-5p	mir-140
AGUGUA	1	1	0	1	1	0	hsa-miR-4280	0
AGUGUG	1	1	0	1	1	0	hsa-miR-648	mir-648
AGUGUU	1	1	0	1	1	0	hsa-miR-4255	0
AGUUAU	1	1	0	1	1	0	hsa-miR-101*	mir-101
AGUUCU	2	2	0	2	2	0	hsa-miR-148b* hsa-miR-3168	mir-148 0
AGUUGG	1	0	1	1	0	1			hsa-miR-4259	0
AUAAAA	1	1	0	1	1	0	hsa-miR-3163	0
AUAAAG	1	1	0	1	1	0	hsa-miR-142-5p	mir-142
AUAAUA	1	0	1	1	0	1			hsa-miR-369-3p	mir-154
AUACAA	2	0	2	1	0	1			hsa-miR-381 hsa-miR-300	mir-154
AUACCU	1	1	0	1	1	0	hsa-miR-875-5p	mir-875
AUAGCC	1	0	1	1	0	1			hsa-miR-3651	0
AUAGGG	1	0	1	1	0	1			hsa-miR-135a*	mir-135
AUAUAA	1	0	1	1	0	1			hsa-miR-410	mir-154
AUAUCA	1	0	1	1	0	1			hsa-miR-3074	mir-3074
AUAUUA	1	0	1	1	0	1			hsa-miR-656	mir-154
AUCACU	1	0	1	1	0	1			hsa-miR-34c-3p	mir-34
AUCAGA	1	0	1	1	0	1			hsa-miR-2115*	0
AUCAUA	2	0	2	1	0	1			hsa-miR-154* hsa-miR-487a	mir-154
AUCAUC	1	0	1	1	0	1			hsa-miR-136*	mir-136
AUCAUG	1	0	1	1	0	1			hsa-miR-96*	mir-96
AUCCCU	1	1	0	1	1	0	hsa-miR-188-5p	mir-188
AUCCUU	3	3	0	2	2	0	hsa-miR-362-5p hsa-miR-501-5p hsa-miR-500b	mir-362 mir-500
AUCGUA	1	0	1	1	0	1			hsa-miR-487b	mir-154
AUCUCU	1	0	1	1	0	1			hsa-miR-3675-3p	0
AUCUGA	1	1	0	1	1	0	hsa-miR-3200-5p	0
AUCUGG	1	0	1	1	0	1			hsa-miR-3126-3p	0
AUCUUA	2	2	0	1	1	0	hsa-miR-200b* hsa-miR-200a*	mir-8
AUCUUC	1	1	0	1	1	0	hsa-miR-141*	mir-8
AUGACA	1	1	0	1	1	0	hsa-miR-425	mir-425
AUGAGC	1	1	0	1	1	0	hsa-miR-556-5p	mir-556
AUGAUG	2	1	1	2	1	1	hsa-miR-1272	mir-1272	hsa-miR-1322	mir-1322
AUGCAC	2	0	2	1	0	1			hsa-miR-501-3p hsa-miR-502-3p	mir-500
AUGCAU	1	1	0	1	1	0	hsa-miR-586	mir-586
AUGCCU	1	1	0	1	1	0	hsa-miR-532-5p	mir-188
AUGCUA	1	0	1	1	0	1			hsa-miR-3146	0
AUGGAA	1	0	1	1	0	1			hsa-miR-3688	0
AUGGAU	1	1	0	1	1	0	hsa-miR-1246	mir-1246
AUGGCA	1	1	0	1	1	0	hsa-miR-183	mir-183
AUGGCG	1	0	1	1	0	1			hsa-miR-652	mir-652
AUGGCU	2	2	0	1	1	0	hsa-miR-135a hsa-miR-135b	mir-135
AUGGGG	1	1	0	1	1	0	hsa-miR-3675-5p	0
AUGGUU	1	0	1	1	0	1			hsa-miR-218-2*	mir-218
AUGUAA	3	0	3	1	0	1			hsa-miR-379* hsa-miR-380 hsa-miR-411*	mir-379
AUGUAG	1	1	0	1	1	0	hsa-miR-3668	0
AUGUCU	1	0	1	1	0	1			hsa-miR-654-3p	mir-654
AUGUGC	1	1	0	1	1	0	hsa-miR-455-5p	mir-455
AUGUGG	1	0	1	1	0	1			hsa-miR-299-3p	mir-299
AUGUUU	1	0	1	1	0	1			hsa-miR-4307	0
AUUAUU	1	1	0	1	1	0	hsa-miR-126*	mir-126
AUUCAA	1	0	1	1	0	1			hsa-miR-4272	0
AUUCAU	1	0	1	1	0	1			hsa-miR-664	mir-664
AUUCCC	1	0	1	1	0	1			hsa-miR-3938	0
AUUGCA	6	1	5	4	1	3	hsa-miR-32	mir-32	hsa-miR-25 hsa-miR-92a hsa-miR-363 hsa-miR-367 hsa-miR-92b	mir-25 mir-363 mir-367
AUUUCA	1	0	1	1	0	1			hsa-miR-205*	mir-205
CAAAAA	1	0	1	1	0	1			hsa-miR-3613-3p	0
CAAAAC	2	1	1	2	1	1	hsa-miR-1323	mir-1323	hsa-miR-548o	0
CAAAGC	1	0	1	1	0	1			hsa-miR-330-3p	mir-330
CAAAGU	2	0	2	1	0	1			hsa-miR-520g hsa-miR-520h	mir-515
CAAAUG	1	1	0	1	1	0	hsa-miR-105	mir-105
CAACAA	1	1	0	1	1	0	hsa-miR-3065-5p	mir-3065
CAAGAG	1	1	0	1	1	0	hsa-miR-335	mir-335
CAAUAU	2	0	2	1	0	1			hsa-miR-16-2* hsa-miR-195*	mir-15
CAAUUA	1	1	0	1	1	0	hsa-miR-4275	0
CACAAG	1	0	1	1	0	1			hsa-miR-125b-2*	mir-125
CACACC	1	0	1	1	0	1			hsa-miR-1228	mir-1228
CACAGU	2	0	2	2	0	2			hsa-miR-128 hsa-miR-3681*	mir-128 0
CACCAG	1	0	1	1	0	1			hsa-miR-1226	mir-1226
CACCCU	1	0	1	1	0	1			hsa-miR-3620	0
CACCUG	2	0	2	1	0	1			hsa-miR-3622a-3p hsa-miR-3622b-3p	mir-3622
CACGCG	1	0	1	1	0	1			hsa-miR-3186-3p	0
CACUCC	1	0	1	1	0	1			hsa-miR-483-3p	mir-483
CACUGU	1	1	0	1	1	0	hsa-miR-1208	mir-1208
CACUUG	1	1	0	1	1	0	hsa-miR-3614-5p	0
CAGAAC	1	0	1	1	0	1			hsa-miR-589*	mir-589
CAGACA	1	0	1	1	0	1			hsa-miR-1324	mir-1324
CAGAGA	1	0	1	1	0	1			hsa-miR-3919	0
CAGAGG	1	0	1	1	0	1			hsa-miR-4257	0
CAGAGU	1	1	0	1	1	0	hsa-miR-759	mir-759
CAGAUU	1	0	1	1	0	1			hsa-miR-10b*	mir-10
CAGCAA	1	0	1	1	0	1			hsa-miR-545	mir-95
CAGCAC	1	0	1	1	0	1			hsa-miR-3065-3p	mir-3065
CAGCAG	4	2	2	4	2	2	hsa-miR-761 hsa-miR-3619	mir-761 0	hsa-miR-214 hsa-miR-922	mir-214 mir-922
CAGCAU	1	0	1	1	0	1			hsa-miR-4310	0
CAGCUG	1	0	1	1	0	1			hsa-miR-1207-3p	mir-1207
CAGGAA	1	1	0	1	1	0	hsa-miR-873	mir-873
CAGGCA	1	1	0	1	1	0	hsa-miR-4269	0
CAGGCC	1	0	1	1	0	1			hsa-miR-1972	mir-1972
CAGGCG	1	0	1	1	0	1			hsa-miR-3937	0
CAGGCU	2	1	1	2	1	1	hsa-miR-484	mir-484	hsa-miR-3155	0
CAGGGA	1	1	0	1	1	0	hsa-miR-4270	0
CAGGGC	1	1	0	1	1	0	hsa-miR-3918	0
CAGGUG	3	2	1	3	2	1	hsa-miR-764 hsa-miR-3934	mir-764 0	hsa-miR-125a-3p	mir-125
CAGUAA	1	1	0	1	1	0	hsa-miR-545*	mir-95
CAGUAG	4	2	2	3	2	1	hsa-miR-936 hsa-miR-3129	mir-936 0	hsa-miR-199a-3p hsa-miR-199b-3p	mir-199
CAGUAU	1	0	1	1	0	1			hsa-miR-16-1*	mir-15
CAGUCC	2	1	1	2	1	1	hsa-miR-1910	mir-1910	hsa-miR-455-3p	mir-455
CAGUCU	1	0	1	1	0	1			hsa-miR-622	mir-622
CAGUGC	3	0	3	1	0	1			hsa-miR-148a hsa-miR-152 hsa-miR-148b	mir-148
CAGUGG	1	0	1	1	0	1			hsa-miR-194*	mir-194
CAGUGU	1	1	0	1	1	0	hsa-miR-4302	0
CAGUUA	1	0	1	1	0	1			hsa-miR-935	mir-935
CAGUUC	1	1	0	1	1	0	hsa-miR-4277	0
CAGUUU	1	0	1	1	0	1			hsa-miR-4328	0
CAUAGC	1	1	0	1	1	0	hsa-miR-103-as	mir-103-as
CAUAUU	1	1	0	1	1	0	hsa-miR-1279	0
CAUGGA	1	1	0	1	1	0	hsa-miR-490-5p	mir-490
CAUGUG	1	1	0	1	1	0	hsa-miR-3607-5p	0
CAUUGC	1	1	0	1	1	0	hsa-miR-4317	0
CAUUGU	1	1	0	1	1	0	hsa-miR-4289	0
CCAAUA	1	0	1	1	0	1			hsa-miR-323b-3p	mir-154
CCACUG	1	0	1	1	0	1			hsa-miR-181a-2*	mir-181
CCAGAU	1	1	0	1	1	0	hsa-miR-488*	mir-488
CCAGCA	1	0	1	1	0	1			hsa-miR-338-3p	mir-338
CCAGCU	1	1	0	1	1	0	hsa-miR-4267	0
CCAGGA	1	0	1	1	0	1			hsa-miR-665	mir-665
CCAGUA	1	1	0	1	1	0	hsa-miR-770-5p	mir-770
CCAGUG	3	2	1	2	1	1	hsa-miR-199a-5p hsa-miR-199b-5p	mir-199	hsa-miR-1825	mir-1825
CCAUCG	1	0	1	1	0	1			hsa-miR-181a*	mir-181
CCAUUA	1	1	0	1	1	0	hsa-miR-885-5p	mir-885
CCCAAA	1	0	1	1	0	1			hsa-miR-186*	mir-186
CCCACC	2	1	1	2	1	1	hsa-miR-1280	mir-1280	hsa-miR-1224-3p	mir-1224
CCCACG	1	0	1	1	0	1			hsa-miR-662	mir-662
CCCACU	1	1	0	1	1	0	hsa-miR-4301	0
CCCAGG	1	0	1	1	0	1			hsa-miR-1915	mir-1915
CCCCAC	1	1	0	1	1	0	hsa-miR-4286	0
CCCCCA	1	0	1	1	0	1			hsa-miR-361-3p	mir-361
CCCCUG	1	0	1	1	0	1			hsa-miR-331-3p	mir-331
CCCGCC	1	1	0	1	1	0	hsa-miR-4258	0
CCCGCG	1	1	0	1	1	0	hsa-miR-1471	mir-1471
CCCGUC	1	1	0	1	1	0	hsa-miR-1247	mir-1247
CCCUAU	1	1	0	1	1	0	hsa-miR-454*	mir-454
CCCUCC	1	1	0	1	1	0	hsa-miR-1470	0
CCCUGA	3	3	0	2	2	0	hsa-miR-125b hsa-miR-125a-5p hsa-miR-4319	mir-125 0
CCCUGG	2	0	2	1	0	1			hsa-miR-4308 hsa-miR-4292	0
CCCUGU	2	2	0	2	2	0	hsa-miR-339-5p hsa-miR-1274b	mir-339 mir-1274
CCGAGC	1	0	1	1	0	1			hsa-miR-615-3p	mir-615
CCGGAC	1	0	1	1	0	1			hsa-miR-3687	0
CCGGAG	1	1	0	1	1	0	hsa-miR-1203	mir-1203
CCGGUU	1	0	1	1	0	1			hsa-miR-671-3p	mir-671
CCGUAC	1	1	0	1	1	0	hsa-miR-3678-5p	0
CCGUCU	1	0	1	1	0	1			hsa-miR-340*	mir-340
CCGUGC	1	0	1	1	0	1			hsa-miR-1973	0
CCGUGG	1	1	0	1	1	0	hsa-miR-132*	mir-132
CCUCUC	1	1	0	1	1	0	hsa-miR-3183	0
CCUCUU	1	0	1	1	0	1			hsa-miR-877*	mir-877
CCUGAG	2	0	2	2	0	2			hsa-miR-544b hsa-miR-4324	mir-544 0
CCUGCG	2	1	1	2	1	1	hsa-miR-3193	0	hsa-miR-1539	0
CCUGCU	1	0	1	1	0	1			hsa-miR-370	mir-370
CCUGGA	2	1	1	2	1	1	hsa-miR-3690	0	hsa-miR-4254	0
CCUGGC	1	1	0	1	1	0	hsa-miR-221*	mir-221
CCUGUA	1	1	0	1	1	0	hsa-miR-486-5p	mir-486
CCUGUG	1	1	0	1	1	0	hsa-miR-1914	mir-1914
CCUUCA	1	1	0	1	1	0	hsa-miR-205	mir-205
CCUUCC	1	0	1	1	0	1			hsa-miR-3667-3p	0
CCUUCU	2	1	1	2	1	1	hsa-miR-1248	mir-1248	hsa-miR-1237	mir-1237
CCUUGC	1	1	0	1	1	0	hsa-miR-1915*	mir-1915
CCUUGG	1	0	1	1	0	1			hsa-miR-3189	0
CGACAG	1	0	1	1	0	1			hsa-miR-196b*	mir-196
CGACCC	2	0	2	1	0	1			hsa-miR-551a hsa-miR-551b	mir-551
CGAGGA	3	2	1	3	2	1	hsa-miR-151-5p hsa-miR-3131	mir-28 0	hsa-miR-611	mir-611
CGCACU	1	0	1	1	0	1			hsa-miR-106b*	mir-17
CGCCCU	1	0	1	1	0	1			hsa-miR-1249	mir-1249
CGCCUC	1	0	1	1	0	1			hsa-miR-1281	mir-1281
CGCUUU	1	1	0	1	1	0	hsa-miR-4315	mir-4315
CGGAAU	1	0	1	1	0	1			hsa-miR-3669	0
CGGAUC	1	0	1	1	0	1			hsa-miR-127-3p	mir-127
CGGAUG	1	0	1	1	0	1			hsa-miR-105*	mir-105
CGGCAU	1	1	0	1	1	0	hsa-miR-4304	0
CGGCCU	1	0	1	1	0	1			hsa-miR-1234	mir-1234
CGGCGA	1	1	0	1	1	0	hsa-miR-4285	0
CGGGGA	1	1	0	1	1	0	hsa-miR-542-5p	mir-542
CGGGUU	1	0	1	1	0	1			hsa-miR-125b-1*	mir-125
CGGUGC	1	1	0	1	1	0	hsa-miR-1250	mir-1250
CGUACC	1	0	1	1	0	1			hsa-miR-126	mir-126
CGUCGC	1	1	0	1	1	0	hsa-miR-1181	mir-1181
CGUGCA	1	0	1	1	0	1			hsa-miR-517b	mir-515
CGUGGC	1	1	0	1	1	0	hsa-miR-1204	mir-1204
CGUGUC	1	0	1	1	0	1			hsa-miR-187	mir-187
CGUGUU	1	0	1	1	0	1			hsa-miR-3676	0
CGUUGG	1	0	1	1	0	1			hsa-miR-1306	mir-1306
CGUUUG	1	1	0	1	1	0	hsa-miR-1282	mir-1282
CUACAA	1	1	0	1	1	0	hsa-miR-1283	mir-515
CUACAG	1	1	0	1	1	0	hsa-miR-139-5p	mir-139
CUACUU	1	0	1	1	0	1			hsa-miR-138-1*	mir-138
CUAGAC	1	1	0	1	1	0	hsa-miR-4305	0
CUAGGC	1	0	1	1	0	1			hsa-miR-645	mir-645
CUAGUA	2	1	1	2	1	1	hsa-miR-325	mir-325	hsa-miR-628-3p	mir-628
CUAGUC	1	1	0	1	1	0	hsa-miR-554	mir-554
CUAUAC	1	1	0	1	1	0	hsa-miR-1284	mir-1284
CUAUUC	2	0	2	1	0	1			hsa-miR-26a-1* hsa-miR-26a-2*	mir-26
CUAUUU	1	0	1	1	0	1			hsa-miR-138-2*	mir-138
CUCAAA	3	3	0	3	3	0	hsa-miR-371-5p hsa-miR-373* hsa-miR-616*	mir-290 mir-373 mir-616
CUCACA	1	0	1	1	0	1			hsa-miR-342-3p	mir-342
CUCAGA	1	0	1	1	0	1			hsa-miR-4330	0
CUCAGG	1	1	0	1	1	0	hsa-miR-1266	mir-1266
CUCAGU	1	1	0	1	1	0	hsa-miR-4264	0
CUCCAG	1	0	1	1	0	1			hsa-miR-766	mir-766
CUCCAU	1	1	0	1	1	0	hsa-miR-136	mir-136
CUCCCA	3	1	2	3	1	2	hsa-miR-150	mir-150	hsa-miR-532-3p hsa-miR-2116*	mir-188 0
CUCCCU	1	1	0	1	1	0	hsa-miR-4287	0
CUCCGU	1	0	1	1	0	1			hsa-miR-3605-3p	0
CUCCUG	1	0	1	1	0	1			hsa-miR-1976	0
CUCGCU	1	1	0	1	1	0	hsa-miR-720	mir-720
CUCGGA	1	0	1	1	0	1			hsa-miR-3917	0
CUCGGC	1	0	1	1	0	1			hsa-miR-1307	mir-1307
CUCUAG	2	2	0	2	2	0	hsa-miR-517* hsa-miR-1251	mir-515 mir-1251
CUCUCG	1	0	1	1	0	1			hsa-miR-3615	0
CUCUGA	2	0	2	2	0	2			hsa-miR-146a* hsa-miR-3921	mir-146 0
CUCUGG	3	2	1	3	2	1	hsa-miR-330-5p hsa-miR-518c*	mir-330 mir-515	hsa-miR-326	mir-326
CUCUUC	1	0	1	1	0	1			hsa-miR-1236	mir-1236
CUCUUU	1	1	0	1	1	0	hsa-miR-130b*	mir-130
CUGACA	1	0	1	1	0	1			hsa-miR-3660	0
CUGACU	1	1	0	1	1	0	hsa-miR-345	mir-345
CUGAGA	2	0	2	1	0	1			hsa-miR-4251 hsa-miR-4329	0
CUGAUU	2	1	1	2	1	1	hsa-miR-29a*	mir-29	hsa-miR-3920	0
CUGCAA	1	0	1	1	0	1			hsa-miR-2276	0
CUGCAC	1	0	1	1	0	1			hsa-miR-3130-3p	mir-3130
CUGCAG	3	1	2	3	1	2	hsa-miR-1205	mir-1205	hsa-miR-17* hsa-miR-1184	mir-17 mir-1184
CUGCAU	1	0	1	1	0	1			hsa-miR-20a*	mir-17
CUGCCC	3	0	3	3	0	3			hsa-miR-18a* hsa-miR-324-3p hsa-miR-1913	mir-17 mir-324 mir-1913
CUGCGC	1	0	1	1	0	1			hsa-miR-191*	mir-191
CUGCUC	1	0	1	1	0	1			hsa-miR-767-3p	mir-767
CUGCUG	2	1	1	2	1	1	hsa-miR-3692*	0	hsa-miR-93*	mir-17
CUGGAA	1	0	1	1	0	1			hsa-miR-875-3p	mir-875
CUGGAC	4	2	2	4	2	2	hsa-miR-422a hsa-miR-378c	mir-422 0	hsa-miR-378 hsa-miR-378b	mir-378 0
CUGGCA	1	1	0	1	1	0	hsa-miR-3128	0
CUGGCC	2	0	2	1	0	1			hsa-miR-3176 hsa-miR-3922	0
CUGGCU	2	2	0	2	2	0	hsa-miR-149 hsa-miR-664*	mir-149 mir-664
CUGGGA	1	1	0	1	1	0	hsa-miR-3192	0
CUGGGC	2	1	1	2	1	1	hsa-miR-612	mir-612	hsa-miR-1285	mir-1285
CUGGGG	1	0	1	1	0	1			hsa-miR-637	mir-637
CUGGUC	1	1	0	1	1	0	hsa-miR-3663-5p	0
CUGGUG	2	1	1	2	1	1	hsa-miR-548q	mir-548	hsa-miR-4299	0
CUGGUU	1	1	0	1	1	0	hsa-miR-29b-1*	mir-29
CUGUAA	1	0	1	1	0	1			hsa-miR-3607-3p	0
CUGUAG	2	1	1	2	1	1	hsa-miR-3137	0	hsa-miR-20b*	mir-17
CUGUUC	1	0	1	1	0	1			hsa-miR-26b*	mir-26
CUGUUG	2	2	0	2	2	0	hsa-miR-367* hsa-miR-1267	mir-367 mir-1267
CUUAAA	1	1	0	1	1	0	hsa-miR-302a*	mir-302
CUUACA	1	0	1	1	0	1			hsa-miR-600	mir-600
CUUACU	1	0	1	1	0	1			hsa-miR-550b	mir-550
CUUCAA	1	1	0	1	1	0	hsa-miR-676*	mir-676
CUUCAC	1	0	1	1	0	1			hsa-miR-412	mir-412
CUUCUC	1	1	0	1	1	0	hsa-miR-942	mir-942
CUUCUG	1	1	0	1	1	0	hsa-miR-3182	0
CUUGGA	1	1	0	1	1	0	hsa-miR-432	mir-432
CUUGGG	1	1	0	1	1	0	hsa-miR-635	mir-635
CUUGUA	1	0	1	1	0	1			hsa-miR-643	mir-643
CUUGUC	1	1	0	1	1	0	hsa-miR-3655	0
CUUGUG	1	1	0	1	1	0	hsa-miR-581	mir-581
CUUUAA	2	2	0	1	1	0	hsa-miR-302b* hsa-miR-302d*	mir-302
CUUUGG	1	1	0	1	1	0	hsa-miR-9	mir-9
GAAAAC	1	0	1	1	0	1			hsa-miR-570	mir-548
GAAAAU	1	0	1	1	0	1			hsa-miR-3647-3p	0
GAAACA	1	0	1	1	0	1			hsa-miR-494	mir-154
GAAGAA	1	1	0	1	1	0	hsa-miR-3185	0
GAAGGA	1	1	0	1	1	0	hsa-miR-1252	mir-1252
GAAGGG	1	0	1	1	0	1			hsa-miR-3179	mir-3179
GAAGGU	1	0	1	1	0	1			hsa-miR-493	mir-493
GAAUCA	1	0	1	1	0	1			hsa-miR-15b*	mir-15
GAAUUG	1	0	1	1	0	1			hsa-miR-219-2-3p	mir-219
GACAAC	1	0	1	1	0	1			hsa-miR-549	mir-549
GACACA	1	0	1	1	0	1			hsa-miR-642b	mir-642
GACAGC	1	0	1	1	0	1			hsa-miR-2277-3p	0
GACCAU	1	1	0	1	1	0	hsa-miR-591	mir-591
GACCCU	1	1	0	1	1	0	hsa-miR-504	mir-504
GACCGA	1	1	0	1	1	0	hsa-miR-29c*	mir-29
GACCUG	2	2	0	2	2	0	hsa-miR-631 hsa-miR-3661	mir-631 0
GACUUC	1	1	0	1	1	0	hsa-miR-617	mir-617
GAGAAA	1	1	0	1	1	0	hsa-miR-539	mir-154
GAGAAC	3	3	0	2	2	0	hsa-miR-146a hsa-miR-146b-5p hsa-miR-589	mir-146 mir-589
GAGAAG	1	1	0	1	1	0	hsa-miR-1253	mir-1253
GAGACC	1	1	0	1	1	0	hsa-miR-769-5p	mir-769
GAGACG	1	0	1	1	0	1			hsa-miR-139-3p	mir-139
GAGAUG	1	0	1	1	0	1			hsa-miR-143	mir-143
GAGCAC	1	0	1	1	0	1			hsa-miR-3663-3p	0
GAGCCC	2	0	2	2	0	2			hsa-miR-1225-3p hsa-miR-1233	mir-1225 mir-1233
GAGCCU	1	0	1	1	0	1			hsa-miR-2114*	0
GAGCGC	1	0	1	1	0	1			hsa-miR-339-3p	mir-339
GAGCUA	1	1	0	1	1	0	hsa-miR-610	mir-610
GAGCUC	1	0	1	1	0	1			hsa-miR-3670	0
GAGCUG	2	0	2	2	0	2			hsa-miR-558 hsa-miR-3160	mir-558 mir-3160
GAGCUU	1	1	0	1	1	0	hsa-miR-27b*	mir-27
GAGGAA	1	0	1	1	0	1			hsa-miR-3928	0
GAGGAG	1	0	1	1	0	1			hsa-miR-3150b	mir-3150
GAGGAU	3	3	0	2	2	0	hsa-miR-1185 hsa-miR-3605-5p hsa-miR-3679-5p	mir-154 0
GAGGCA	1	0	1	1	0	1			hsa-miR-1827	mir-1827
GAGGCG	1	1	0	1	1	0	hsa-miR-3197	0
GAGGCU	2	1	1	2	1	1	hsa-miR-485-5p	mir-485	hsa-miR-3188	0
GAGGGA	1	1	0	1	1	0	hsa-miR-3126-5p	0
GAGGGC	1	0	1	1	0	1			hsa-miR-3616-3p	0
GAGGGG	3	2	1	3	2	1	hsa-miR-423-5p hsa-miR-3184	mir-423 0	hsa-miR-1914*	mir-1914
GAGGUA	9	8	1	2	1	1	hsa-let-7a hsa-let-7b hsa-let-7d hsa-let-7e hsa-let-7f hsa-miR-98 hsa-let-7g hsa-let-7i	let-7	hsa-miR-202	mir-202
GAGGUU	1	1	0	1	1	0	hsa-miR-377*	mir-154
GAGUAC	1	1	0	1	1	0	hsa-miR-1911	0
GAGUAU	1	0	1	1	0	1			hsa-miR-496	mir-154
GAGUCU	1	1	0	1	1	0	hsa-miR-924	mir-924
GAGUGC	1	1	0	1	1	0	hsa-miR-1909*	mir-1909
GAGUGU	2	1	1	2	1	1	hsa-miR-574-5p	mir-574	hsa-miR-3659	0
GAGUUG	2	0	2	2	0	2			hsa-miR-219-1-3p hsa-miR-571	mir-219 mir-571
GAUAUC	1	1	0	1	1	0	hsa-miR-144*	mir-144
GAUAUG	2	2	0	1	1	0	hsa-miR-190 hsa-miR-190b	mir-190
GAUAUU	1	0	1	1	0	1			hsa-miR-3145	0
GAUCAG	1	1	0	1	1	0	hsa-miR-383	mir-383
GAUCGA	1	1	0	1	1	0	hsa-miR-369-5p	mir-154
GAUGAU	1	0	1	1	0	1			hsa-miR-3682	0
GAUGGA	1	0	1	1	0	1			hsa-miR-3134	0
GAUGUA	1	1	0	1	1	0	hsa-miR-3171	0
GAUUCC	1	0	1	1	0	1			hsa-miR-145*	mir-145
GAUUGG	1	0	1	1	0	1			hsa-miR-509-3p	mir-506
GAUUGU	2	1	1	2	1	1	hsa-miR-219-5p	mir-219	hsa-miR-508-3p	mir-506
GCAACG	1	1	0	1	1	0	hsa-miR-891a	mir-891
GCAACU	1	1	0	1	1	0	hsa-miR-891b	mir-891
GCACCA	1	1	0	1	1	0	hsa-miR-767-5p	mir-767
GCACGG	1	0	1	1	0	1			hsa-miR-3177	0
GCAGAA	1	1	0	1	1	0	hsa-miR-298	mir-298
GCAGAC	1	0	1	1	0	1			hsa-miR-3166	0
GCAGCA	2	0	2	1	0	1			hsa-miR-103 hsa-miR-107	mir-103
GCAGGA	1	0	1	1	0	1			hsa-miR-1286	mir-1286
GCAGGG	1	0	1	1	0	1			hsa-miR-1909	mir-1909
GCAGGU	2	1	1	2	1	1	hsa-miR-3665	0	hsa-miR-657	mir-657
GCAUCC	1	1	0	1	1	0	hsa-miR-324-5p	mir-324
GCCACU	1	0	1	1	0	1			hsa-miR-4252	0
GCCAGC	1	1	0	1	1	0	hsa-miR-3194	0
GCCCCC	1	1	0	1	1	0	hsa-miR-4313	0
GCCCUA	1	0	1	1	0	1			hsa-miR-18b*	mir-17
GCCCUC	1	0	1	1	0	1			hsa-miR-4290	0
GCCCUG	1	0	1	1	0	1			hsa-miR-146b-3p	mir-146
GCCCUU	1	1	0	1	1	0	hsa-miR-938	mir-938
GCCGCG	1	1	0	1	1	0	hsa-miR-3648	0
GCCUAC	2	2	0	1	1	0	hsa-miR-24-1* hsa-miR-24-2*	mir-24
GCCUAG	1	1	0	1	1	0	hsa-miR-3135	0
GCCUGG	3	1	2	3	1	2	hsa-miR-1254	mir-1254	hsa-miR-661 hsa-miR-3116	mir-661 mir-3116
GCCUGU	1	1	0	1	1	0	hsa-miR-214*	mir-214
GCCUUC	1	1	0	1	1	0	hsa-miR-4297	0
GCCUUG	1	0	1	1	0	1			hsa-miR-4312	0
GCGACA	2	2	0	1	1	0	hsa-miR-1273c hsa-miR-3683	0
GCGCCG	1	1	0	1	1	0	hsa-miR-3195	0
GCGCGG	1	1	0	1	1	0	hsa-miR-2277-5p	0
GCGGAG	1	0	1	1	0	1			hsa-miR-658	mir-658
GCGGGG	1	1	0	1	1	0	hsa-miR-744	mir-744
GCGGGU	2	1	1	2	1	1	hsa-miR-3621	0	hsa-miR-3656	0
GCUACA	4	1	3	3	1	2	hsa-miR-187*	mir-187	hsa-miR-221 hsa-miR-222 hsa-miR-548v	mir-221 mir-548
GCUAGC	1	0	1	1	0	1			hsa-miR-621	mir-621
GCUAUG	1	0	1	1	0	1			hsa-miR-31*	mir-31
GCUCCU	1	0	1	1	0	1			hsa-miR-4268	0
GCUCGG	1	0	1	1	0	1			hsa-miR-423-3p	mir-423
GCUGGA	1	1	0	1	1	0	hsa-miR-1287	mir-1287
GCUGGU	1	1	0	1	1	0	hsa-miR-138	mir-138
GCUGUC	1	0	1	1	0	1			hsa-miR-626	mir-626
GCUUCC	3	1	2	2	1	1	hsa-miR-2115	0	hsa-miR-516b* hsa-miR-516a-3p	mir-515
GCUUCU	1	1	0	1	1	0	hsa-miR-103-2*	mir-103
GCUUGC	1	1	0	1	1	0	hsa-miR-4327	0
GCUUUU	1	0	1	1	0	1			hsa-miR-3140	0
GGAAAA	1	1	0	1	1	0	hsa-miR-3148	0
GGAAAC	1	0	1	1	0	1			hsa-miR-4261	0
GGAAGA	1	1	0	1	1	0	hsa-miR-7	mir-7
GGAAGC	1	1	0	1	1	0	hsa-miR-671-5p	mir-671
GGAAGG	1	1	0	1	1	0	hsa-miR-3202	mir-3202
GGAAUG	3	0	3	2	0	2			hsa-miR-1 hsa-miR-206 hsa-miR-613	mir-1 mir-613
GGACCC	1	0	1	1	0	1			hsa-miR-711	mir-711
GGACCU	1	1	0	1	1	0	hsa-miR-492	mir-492
GGACGG	1	0	1	1	0	1			hsa-miR-184	mir-184
GGACUG	1	0	1	1	0	1			hsa-miR-1288	mir-1288
GGAGAG	2	1	1	2	1	1	hsa-miR-185	mir-185	hsa-miR-4306	0
GGAGCC	1	1	0	1	1	0	hsa-miR-505*	mir-505
GGAGGA	1	0	1	1	0	1			hsa-miR-765	mir-765
GGAGGC	2	2	0	2	2	0	hsa-miR-650 hsa-miR-3612	mir-650 0
GGAGUC	2	1	1	2	1	1	hsa-miR-4294	0	hsa-miR-1289	mir-1289
GGAGUG	1	1	0	1	1	0	hsa-miR-122	mir-122
GGAUAU	1	1	0	1	1	0	hsa-miR-3201	0
GGAUGA	2	2	0	1	1	0	hsa-miR-1255a hsa-miR-1255b	mir-1255
GGAUGG	1	1	0	1	1	0	hsa-miR-1193	mir-1193
GGAUUC	1	0	1	1	0	1			hsa-miR-4320	0
GGAUUU	3	1	2	3	1	2	hsa-miR-876-5p	mir-876	hsa-miR-1290 hsa-miR-3167	mir-1290 0
GGCAAC	1	0	1	1	0	1			hsa-miR-196a*	mir-196
GGCAAG	1	1	0	1	1	0	hsa-miR-31	mir-31
GGCACC	1	1	0	1	1	0	hsa-miR-593*	mir-593
GGCACG	1	1	0	1	1	0	hsa-miR-564	mir-564
GGCAGC	1	0	1	1	0	1			hsa-miR-885-3p	mir-885
GGCAGG	1	1	0	1	1	0	hsa-miR-1207-5p	mir-1207
GGCAGU	4	4	0	2	2	0	hsa-miR-34a hsa-miR-34c-5p hsa-miR-449a hsa-miR-449b	mir-34 mir-449
GGCAUG	1	1	0	1	1	0	hsa-miR-3622b-5p	mir-3622
GGCAUU	1	1	0	1	1	0	hsa-miR-1256	mir-1256
GGCCAA	1	1	0	1	1	0	hsa-miR-3926	mir-3926
GGCCCG	1	0	1	1	0	1			hsa-miR-1538	mir-1538
GGCCCU	1	1	0	1	1	0	hsa-miR-1291	mir-1291
GGCGAC	1	0	1	1	0	1			hsa-miR-1273	mir-1273
GGCGCC	1	1	0	1	1	0	hsa-miR-566	mir-566
GGCGGA	1	1	0	1	1	0	hsa-miR-25*	mir-25
GGCGGG	2	2	0	2	2	0	hsa-miR-663 hsa-miR-1908	mir-663 mir-1908
GGCUCA	2	1	1	2	1	1	hsa-miR-4284	0	hsa-miR-24	mir-24
GGCUCU	1	0	1	1	0	1			hsa-miR-760	mir-760
GGCUGC	1	0	1	1	0	1			hsa-miR-604	mir-604
GGCUGG	1	1	0	1	1	0	hsa-miR-3652	0
GGCUUU	1	1	0	1	1	0	hsa-miR-3119	mir-3119
GGGAAA	1	0	1	1	0	1			hsa-miR-3153	0
GGGAAC	1	1	0	1	1	0	hsa-miR-1292	mir-1292
GGGACC	1	0	1	1	0	1			hsa-miR-3649	0
GGGACG	1	1	0	1	1	0	hsa-miR-92b*	mir-25
GGGACU	2	2	0	2	2	0	hsa-miR-365* hsa-miR-3199	mir-365 mir-3199
GGGAGC	2	0	2	2	0	2			hsa-miR-920 hsa-miR-4300	mir-920 0
GGGAGG	1	0	1	1	0	1			hsa-miR-149*	mir-149
GGGAUC	1	1	0	1	1	0	hsa-miR-638	mir-638
GGGCAU	2	1	1	2	1	1	hsa-miR-3945	0	hsa-miR-4253	0
GGGCCC	1	1	0	1	1	0	hsa-miR-296-5p	mir-296
GGGCCU	1	0	1	1	0	1			hsa-miR-2861	mir-2861
GGGCGC	1	1	0	1	1	0	hsa-miR-3178	0
GGGCGU	2	1	1	2	1	1	hsa-miR-1268	mir-1268	hsa-miR-585	0
GGGCUG	1	0	1	1	0	1			hsa-miR-762	mir-762
GGGCUU	1	1	0	1	1	0	hsa-miR-27a*	mir-27
GGGGAA	1	0	1	1	0	1			hsa-miR-4271	0
GGGGAC	2	1	1	2	1	1	hsa-miR-3144-5p	0	hsa-miR-3191	0
GGGGAG	2	2	0	2	2	0	hsa-miR-939 hsa-miR-3175	mir-939 0
GGGGCA	1	0	1	1	0	1			hsa-miR-486-3p	mir-486
GGGGCG	3	2	1	3	2	1	hsa-miR-3196 hsa-miR-3180	0 mir-3180	hsa-miR-3180-3p	mir-3180
GGGGCU	2	1	1	2	1	1	hsa-miR-4283	mir-4283	hsa-miR-185*	mir-185
GGGGGA	1	1	0	1	1	0	hsa-miR-625	mir-625
GGGGUC	1	1	0	1	1	0	hsa-miR-615-5p	mir-615
GGGGUG	2	2	0	2	2	0	hsa-miR-342-5p hsa-miR-608	mir-342 mir-608
GGGGUU	1	1	0	1	1	0	hsa-miR-193b*	mir-193
GGGUAA	1	0	1	1	0	1			hsa-miR-555	mir-555
GGGUAG	1	1	0	1	1	0	hsa-miR-3132	0
GGGUCU	1	1	0	1	1	0	hsa-miR-193a-5p	mir-193
GGGUGG	2	2	0	2	2	0	hsa-miR-363* hsa-miR-1293	mir-363 mir-1293
GGGUGU	1	1	0	1	1	0	hsa-miR-609	mir-609
GGGUUC	2	2	0	1	1	0	hsa-miR-23a* hsa-miR-23b*	mir-23
GGGUUU	1	1	0	1	1	0	hsa-miR-629	0
GGUAGA	1	1	0	1	1	0	hsa-miR-379	mir-379
GGUCCC	1	0	1	1	0	1			hsa-miR-4281	0
GGUCUA	1	1	0	1	1	0	hsa-miR-601	mir-601
GGUGCG	1	1	0	1	1	0	hsa-miR-675	mir-675
GGUGCU	1	0	1	1	0	1			hsa-miR-3907	0
GGUGGA	1	1	0	1	1	0	hsa-miR-3165	0
GGUGGG	3	2	1	3	2	1	hsa-miR-92a-2* hsa-miR-654-5p	mir-25 mir-654	hsa-miR-541	mir-541
GGUGGU	2	1	1	2	1	1	hsa-miR-323-5p	mir-154	hsa-miR-876-3p	mir-876
GGUGUG	1	1	0	1	1	0	hsa-miR-3650	0
GGUUAC	1	1	0	1	1	0	hsa-miR-409-5p	mir-154
GGUUCU	1	0	1	1	0	1			hsa-miR-182*	mir-182
GGUUGA	2	1	1	2	1	1	hsa-miR-380*	mir-379	hsa-miR-563	mir-563
GGUUGG	1	1	0	1	1	0	hsa-miR-92a-1*	mir-25
GGUUGU	1	1	0	1	1	0	hsa-miR-323b-5p	mir-154
GGUUUA	1	1	0	1	1	0	hsa-miR-299-5p	mir-299
GUAAAC	5	5	0	1	1	0	hsa-miR-30a hsa-miR-30c hsa-miR-30d hsa-miR-30b hsa-miR-30e	mir-30
GUAACA	1	1	0	1	1	0	hsa-miR-194	mir-194
GUAGAU	1	0	1	1	0	1			hsa-miR-3935	0
GUAGUG	1	0	1	1	0	1			hsa-miR-142-3p	mir-142
GUAUCC	1	1	0	1	1	0	hsa-miR-3713	0
GUAUGU	1	1	0	1	1	0	hsa-miR-567	mir-567
GUAUUC	1	0	1	1	0	1			hsa-miR-630	mir-630
GUCAAC	1	0	1	1	0	1			hsa-miR-505	mir-505
GUCACU	1	0	1	1	0	1			hsa-miR-668	mir-668
GUCAGU	1	0	1	1	0	1			hsa-miR-223	mir-223
GUCAUU	1	0	1	1	0	1			hsa-miR-616	mir-616
GUCCAG	1	1	0	1	1	0	hsa-miR-198	mir-198
GUCCUC	1	0	1	1	0	1			hsa-miR-3909	0
GUCUAC	2	1	1	2	1	1	hsa-miR-934	mir-934	hsa-miR-3618	0
GUCUCU	1	0	1	1	0	1			hsa-miR-593	mir-593
GUCUGC	1	1	0	1	1	0	hsa-miR-346	mir-346
GUCUUA	2	1	1	2	1	1	hsa-miR-200c*	mir-8	hsa-miR-550a*	mir-550
GUCUUG	1	1	0	1	1	0	hsa-miR-431	mir-431
GUGAAU	1	1	0	1	1	0	hsa-miR-1257	mir-1257
GUGACA	1	0	1	1	0	1			hsa-miR-542-3p	mir-542
GUGACU	3	2	1	3	2	1	hsa-miR-134 hsa-miR-3164	mir-134 0	hsa-miR-3118	mir-3118
GUGAGG	2	2	0	2	2	0	hsa-miR-1294 hsa-miR-4316	mir-1294 0
GUGAUA	2	2	0	1	1	0	hsa-miR-3689a-5p hsa-miR-3689b	mir-3689
GUGCAA	2	0	2	1	0	1			hsa-miR-19a hsa-miR-19b	mir-19
GUGCAG	1	1	0	1	1	0	hsa-miR-143*	mir-143
GUGCCA	1	0	1	1	0	1			hsa-miR-1227	mir-1227
GUGCCU	1	1	0	1	1	0	hsa-miR-550a	mir-550
GUGCGC	1	0	1	1	0	1			hsa-miR-933	mir-933
GUGCUU	1	0	1	1	0	1			hsa-miR-636	mir-636
GUGGAA	1	0	1	1	0	1			hsa-miR-3190	0
GUGGAC	1	0	1	1	0	1			hsa-miR-3138	0
GUGGAU	1	1	0	1	1	0	hsa-miR-3691	0
GUGGCC	1	0	1	1	0	1			hsa-miR-663b	mir-663
GUGGGG	2	2	0	2	2	0	hsa-miR-491-5p hsa-miR-3151	mir-491 0
GUGUAU	1	1	0	1	1	0	hsa-miR-223*	mir-223
GUGUCA	1	1	0	1	1	0	hsa-miR-597	mir-597
GUGUCC	1	0	1	1	0	1			hsa-miR-3657	0
GUGUGG	2	1	1	2	1	1	hsa-miR-3911	0	hsa-miR-644	mir-644
GUGUUA	1	0	1	1	0	1			hsa-miR-3152	0
GUGUUC	1	1	0	1	1	0	hsa-miR-124*	mir-124
GUUAAU	1	0	1	1	0	1			hsa-miR-569	mir-569
GUUAGG	1	0	1	1	0	1			hsa-miR-1258	mir-1258
GUUCAU	1	1	0	1	1	0	hsa-miR-1206	mir-1206
GUUCCU	1	1	0	1	1	0	hsa-miR-4326	0
GUUCUC	1	0	1	1	0	1			hsa-miR-2117	0
GUUCUU	2	2	0	2	2	0	hsa-miR-22* hsa-miR-2116	mir-22 0
GUUGGG	1	1	0	1	1	0	hsa-miR-3147	0
GUUGUA	1	1	0	1	1	0	hsa-miR-3613-5p	0
GUUUUG	4	4	0	2	2	0	hsa-miR-19a* hsa-miR-19b-1* hsa-miR-19b-2* hsa-miR-2052	mir-19 0
UAAAGC	1	0	1	1	0	1			hsa-miR-9*	mir-9
UAACAU	1	1	0	1	1	0	hsa-miR-3143	0
UAAGAA	1	0	1	1	0	1			hsa-miR-3653	0
UAAGAC	3	1	2	2	1	1	hsa-miR-499-5p	mir-499	hsa-miR-208a hsa-miR-208b	mir-208
UAAUAC	2	1	1	2	1	1	hsa-miR-374c	mir-374	hsa-miR-655	mir-154
UAAUAG	1	0	1	1	0	1			hsa-miR-633	mir-633
UAAUAU	1	0	1	1	0	1			hsa-miR-889	mir-889
UAAUGC	1	1	0	1	1	0	hsa-miR-155	mir-155
UACAAA	2	2	0	1	1	0	hsa-miR-524-5p hsa-miR-520d-5p	mir-515
UACACA	2	0	2	2	0	2			hsa-miR-466 hsa-miR-3941	mir-467 0
UACAGU	1	1	0	1	1	0	hsa-miR-582-5p	mir-582
UAGACC	1	0	1	1	0	1			hsa-miR-3684	0
UAGACU	1	0	1	1	0	1			hsa-miR-151-3p	mir-28
UAGAGG	1	1	0	1	1	0	hsa-miR-877	mir-877
UAGAUU	1	1	0	1	1	0	hsa-miR-376a*	mir-368
UAGCGG	1	0	1	1	0	1			hsa-miR-4321	0
UAGGAC	1	0	1	1	0	1			hsa-miR-3117	0
UAGGAG	1	0	1	1	0	1			hsa-miR-4266	0
UAGGCC	1	0	1	1	0	1			hsa-miR-1295	mir-1295
UAGGGA	1	1	0	1	1	0	hsa-miR-3162	0
UAGGGC	1	1	0	1	1	0	hsa-miR-1296	mir-1296
UAGGGG	1	0	1	1	0	1			hsa-miR-4278	0
UAGGUA	1	1	0	1	1	0	hsa-miR-331-5p	mir-331
UAGUGA	2	2	0	2	2	0	hsa-miR-921 hsa-miR-3606	mir-921 0
UAUAAA	1	1	0	1	1	0	hsa-miR-340	mir-340
UAUAAU	2	2	0	1	1	0	hsa-miR-374a hsa-miR-374b	mir-374
UAUACA	4	0	4	1	0	1			hsa-let-7a* hsa-let-7b* hsa-let-7f-1* hsa-let-7f-2*	let-7
UAUACC	1	0	1	1	0	1			hsa-miR-3144-3p	0
UAUACG	2	0	2	1	0	1			hsa-let-7d* hsa-let-7e*	let-7
UAUCAG	1	1	0	1	1	0	hsa-miR-361-5p	mir-361
UAUGGG	1	1	0	1	1	0	hsa-miR-3115	0
UAUGGU	1	1	0	1	1	0	hsa-miR-584	mir-584
UAUGUA	1	0	1	1	0	1			hsa-miR-3924	0
UAUUAC	1	0	1	1	0	1			hsa-miR-556-3p	mir-556
UAUUGC	1	0	1	1	0	1			hsa-miR-137	mir-137
UCAAAU	1	0	1	1	0	1			hsa-miR-3671	0
UCAACA	1	0	1	1	0	1			hsa-miR-421	mir-95
UCAACG	1	0	1	1	0	1			hsa-miR-95	mir-95
UCAAGU	3	2	1	2	1	1	hsa-miR-26a hsa-miR-26b	mir-26	hsa-miR-1297	mir-1297
UCACAA	1	1	0	1	1	0	hsa-miR-513b	mir-506
UCACAC	1	0	1	1	0	1			hsa-miR-377	mir-154
UCACAG	3	1	2	2	1	1	hsa-miR-513a-5p	mir-506	hsa-miR-27a hsa-miR-27b	mir-27
UCACAU	4	1	3	3	1	2	hsa-miR-130a*	mir-130	hsa-miR-23a hsa-miR-23b hsa-miR-23c	mir-23 0
UCACCA	1	0	1	1	0	1			hsa-miR-197	mir-197
UCAGCA	1	1	0	1	1	0	hsa-miR-4291	0
UCAGCC	1	1	0	1	1	0	hsa-miR-3157	0
UCAGGG	1	1	0	1	1	0	hsa-miR-3127	0
UCAGUA	1	1	0	1	1	0	hsa-miR-222*	mir-221
UCAGUG	1	1	0	1	1	0	hsa-miR-4276	0
UCAUAC	1	0	1	1	0	1			hsa-miR-485-3p	mir-485
UCAUAG	2	0	2	1	0	1			hsa-miR-376a hsa-miR-376b	mir-368
UCAUCU	1	0	1	1	0	1			hsa-miR-452*	mir-452
UCAUGA	1	0	1	1	0	1			hsa-miR-433	mir-433
UCAUUC	1	1	0	1	1	0	hsa-miR-1298	mir-1298
UCAUUU	1	0	1	1	0	1			hsa-miR-579	mir-548
UCCAGA	2	2	0	1	1	0	hsa-miR-520a-5p hsa-miR-525-5p	mir-515
UCCAGU	1	1	0	1	1	0	hsa-miR-145	mir-145
UCCCAC	3	2	1	3	2	1	hsa-miR-1260 hsa-miR-1260b	mir-1260 0	hsa-miR-188-3p	mir-188
UCCCCA	1	1	0	1	1	0	hsa-miR-2355-5p	mir-2355
UCCCUC	1	1	0	1	1	0	hsa-miR-642a	mir-642
UCCCUG	2	2	0	2	2	0	hsa-miR-670 hsa-miR-1274a	mir-670 mir-1274
UCCCUU	3	3	0	2	2	0	hsa-miR-204 hsa-miR-211 hsa-miR-623	mir-204 mir-623
UCCGCG	1	0	1	1	0	1			hsa-miR-937	mir-937
UCCGCU	1	0	1	1	0	1			hsa-miR-572	mir-572
UCCGUU	1	1	0	1	1	0	hsa-miR-1468	mir-1468
UCCUAC	1	0	1	1	0	1			hsa-miR-155*	mir-155
UCCUAU	2	1	1	2	1	1	hsa-miR-202*	mir-202	hsa-miR-337-3p	mir-337
UCCUGA	2	2	0	2	2	0	hsa-miR-378* hsa-miR-1200	mir-378 mir-1200
UCCUUG	1	1	0	1	1	0	hsa-miR-502-5p	mir-500
UCGCGG	1	1	0	1	1	0	hsa-miR-3124	0
UCGCUG	1	0	1	1	0	1			hsa-miR-639	mir-639
UCGGCG	1	1	0	1	1	0	hsa-miR-1469	mir-1469
UCGGGA	1	0	1	1	0	1			hsa-miR-425*	mir-425
UCGGGC	2	1	1	2	1	1	hsa-miR-3181	0	hsa-miR-3944	0
UCGUGC	2	0	2	1	0	1			hsa-miR-517a hsa-miR-517c	mir-515
UCGUGG	1	0	1	1	0	1			hsa-miR-3677	0
UCUAGA	10	10	0	1	1	0	hsa-miR-519c-5p hsa-miR-519b-5p hsa-miR-523* hsa-miR-518f* hsa-miR-526a hsa-miR-520c-5p hsa-miR-518e* hsa-miR-518d-5p hsa-miR-522* hsa-miR-519a*	mir-515
UCUCAA	2	2	0	1	1	0	hsa-miR-513c hsa-miR-514b-5p	mir-506
UCUCAC	1	0	1	1	0	1			hsa-miR-1229	0
UCUCCA	2	2	0	1	1	0	hsa-miR-515-5p hsa-miR-519e*	mir-515
UCUCCU	1	0	1	1	0	1			hsa-miR-4279	0
UCUCGA	1	1	0	1	1	0	hsa-miR-516a-5p	mir-515
UCUGAC	1	1	0	1	1	0	hsa-miR-4256	0
UCUGAG	1	1	0	1	1	0	hsa-miR-4303	0
UCUGGA	2	1	1	2	1	1	hsa-miR-516b	mir-515	hsa-miR-1299	mir-1299
UCUGGG	1	1	0	1	1	0	hsa-miR-4314	0
UCUGUA	1	0	1	1	0	1			hsa-miR-3686	0
UCUUGA	1	1	0	1	1	0	hsa-miR-526b	mir-515
UGAAAG	1	0	1	1	0	1			hsa-miR-488	mir-488
UGAAAU	1	0	1	1	0	1			hsa-miR-203	mir-203
UGAACG	1	0	1	1	0	1			hsa-miR-887	mir-887
UGAAGC	1	1	0	1	1	0	hsa-miR-127-5p	mir-127
UGAAGU	3	3	0	2	2	0	hsa-miR-573 hsa-miR-3616-5p hsa-miR-3647-5p	mir-573 0
UGAAUU	1	0	1	1	0	1			hsa-miR-183*	mir-183
UGACAU	1	0	1	1	0	1			hsa-miR-489	mir-489
UGACCU	2	2	0	1	1	0	hsa-miR-192 hsa-miR-215	mir-192
UGACUG	2	1	1	2	1	1	hsa-miR-3136	0	hsa-miR-943	mir-943
UGAGAA	1	0	1	1	0	1			hsa-miR-580	mir-580
UGAGAC	1	1	0	1	1	0	hsa-miR-3672	0
UGAGGA	2	2	0	2	2	0	hsa-miR-1224-5p hsa-miR-3915	mir-1224 0
UGAGGG	1	1	0	1	1	0	hsa-miR-1226*	mir-1226
UGAGUC	1	1	0	1	1	0	hsa-miR-627	mir-627
UGAUAA	1	1	0	1	1	0	hsa-miR-3161	0
UGAUCC	1	0	1	1	0	1			hsa-miR-640	mir-640
UGCAAA	2	2	0	1	1	0	hsa-miR-518a-5p hsa-miR-527	mir-515
UGCAAU	1	0	1	1	0	1			hsa-miR-106a*	mir-17
UGCACC	1	0	1	1	0	1			hsa-miR-500a*	mir-500
UGCACU	1	1	0	1	1	0	hsa-miR-4325	0
UGCAGA	1	0	1	1	0	1			hsa-miR-3678-3p	0
UGCAGC	1	0	1	1	0	1			hsa-miR-1301	mir-1301
UGCAUA	2	0	2	2	0	2			hsa-miR-153 hsa-miR-448	mir-153 mir-448
UGCAUU	2	2	0	1	1	0	hsa-miR-33a hsa-miR-33b	mir-33
UGCCAA	1	0	1	1	0	1			hsa-miR-192*	mir-192
UGCCAG	1	1	0	1	1	0	hsa-miR-1202	mir-1202
UGCCCU	1	0	1	1	0	1			hsa-miR-874	mir-874
UGCGCA	1	0	1	1	0	1			hsa-let-7i*	let-7
UGCUAG	1	0	1	1	0	1			hsa-miR-449c*	mir-449
UGCUCA	1	0	1	1	0	1			hsa-miR-1178	mir-1178
UGCUGA	1	1	0	1	1	0	hsa-miR-628-5p	mir-628
UGCUUG	1	1	0	1	1	0	hsa-miR-1273e	mir-1273
UGGAAU	1	0	1	1	0	1			hsa-miR-3673	0
UGGACU	1	0	1	1	0	1			hsa-miR-1269	mir-1269
UGGAGA	2	1	1	2	1	1	hsa-miR-1270	mir-1270	hsa-miR-620	0
UGGAGU	2	1	1	2	1	1	hsa-miR-4309	0	hsa-miR-3198	0
UGGAUA	1	1	0	1	1	0	hsa-miR-1261	mir-1261
UGGAUG	1	0	1	1	0	1			hsa-miR-432*	mir-432
UGGCCA	3	1	2	3	1	2	hsa-miR-588	mir-588	hsa-miR-548s hsa-miR-3187	mir-548 0
UGGCCC	1	0	1	1	0	1			hsa-miR-328	mir-328
UGGCUG	1	1	0	1	1	0	hsa-miR-647	mir-647
UGGGAC	2	1	1	2	1	1	hsa-miR-4298	0	hsa-miR-1302	mir-1302
UGGGAG	5	0	5	2	0	2			hsa-miR-30c-2* hsa-miR-30b* hsa-miR-30c-1* hsa-miR-3689a-3p hsa-miR-3689b*	mir-30 mir-3689
UGGGAU	2	0	2	2	0	2			hsa-miR-769-3p hsa-miR-450b-3p	mir-769 mir-450
UGGGCG	1	1	0	1	1	0	hsa-miR-1228*	mir-1228
UGGGGA	2	1	1	2	1	1	hsa-miR-2110	0	hsa-miR-3150	mir-3150
UGGGGG	1	1	0	1	1	0	hsa-miR-1275	mir-1275
UGGGGU	1	1	0	1	1	0	hsa-miR-3170	0
UGGGUA	1	1	0	1	1	0	hsa-miR-1225-5p	mir-1225
UGGGUG	1	1	0	1	1	0	hsa-miR-1262	mir-1262
UGGUAC	2	1	1	2	1	1	hsa-miR-1263	mir-1263	hsa-miR-150*	mir-150
UGGUUC	1	0	1	1	0	1			hsa-miR-218-1*	mir-218
UGGUUU	1	1	0	1	1	0	hsa-miR-29b-2*	mir-29
UGUAAU	1	1	0	1	1	0	hsa-miR-2054	0
UGUACA	3	1	2	2	1	1	hsa-miR-493*	mir-493	hsa-let-7a-2* hsa-let-7g*	let-7
UGUAGG	1	0	1	1	0	1			hsa-miR-135b*	mir-135
UGUAUA	1	1	0	1	1	0	hsa-miR-568	mir-568
UGUAUG	2	1	1	2	1	1	hsa-miR-297	mir-297	hsa-miR-675*	mir-675
UGUCCU	1	0	1	1	0	1			hsa-miR-676	mir-676
UGUCUG	3	1	2	3	1	2	hsa-miR-1231	0	hsa-miR-632 hsa-miR-4288	mir-632 0
UGUCUU	1	1	0	1	1	0	hsa-miR-511	mir-506
UGUGAA	1	0	1	1	0	1			hsa-miR-3611	0
UGUGCG	2	0	2	2	0	2			hsa-miR-210 hsa-miR-147b	mir-210 mir-147
UGUGCU	1	1	0	1	1	0	hsa-miR-218	mir-218
UGUGGG	3	1	2	2	1	1	hsa-miR-4296	0	hsa-miR-4322 hsa-miR-4265	0
UGUGUC	1	1	0	1	1	0	hsa-miR-592	mir-592
UGUGUG	1	0	1	1	0	1			hsa-miR-147a	mir-147
UGUUAA	1	0	1	1	0	1			hsa-miR-2053	0
UGUUCU	1	1	0	1	1	0	hsa-miR-4273	0
UGUUGA	1	1	0	1	1	0	hsa-miR-653	mir-653
UGUUGC	1	0	1	1	0	1			hsa-miR-744*	mir-744
UUAACA	1	1	0	1	1	0	hsa-miR-302c*	mir-302
UUAAGA	1	1	0	1	1	0	hsa-miR-3658	0
UUAGAG	1	0	1	1	0	1			hsa-miR-1303	mir-1303
UUAGCA	1	0	1	1	0	1			hsa-miR-374b*	mir-374
UUAGGA	1	1	0	1	1	0	hsa-miR-651	mir-651
UUAGGG	1	1	0	1	1	0	hsa-miR-2909	0
UUAUCA	1	0	1	1	0	1			hsa-miR-374a*	mir-374
UUAUGC	1	0	1	1	0	1			hsa-miR-491-3p	mir-491
UUCAAA	1	0	1	1	0	1			hsa-miR-607	mir-607
UUCAAG	1	1	0	1	1	0	hsa-miR-498	mir-498
UUCCAC	1	0	1	1	0	1			hsa-miR-3692	0
UUCCAG	1	1	0	1	1	0	hsa-miR-3180-5p	mir-3180
UUCCAU	1	1	0	1	1	0	hsa-miR-587	mir-587
UUCCCC	1	0	1	1	0	1			hsa-miR-3679-3p	0
UUCCGC	1	0	1	1	0	1			hsa-miR-718	mir-718
UUCCGG	1	0	1	1	0	1			hsa-miR-1180	mir-1180
UUCCUA	2	1	1	2	1	1	hsa-miR-3685	0	hsa-miR-384	mir-384
UUCCUC	1	0	1	1	0	1			hsa-miR-1238	mir-1238
UUCUAA	2	1	1	2	1	1	hsa-miR-576-5p	mir-576	hsa-miR-4263	0
UUCUCC	1	0	1	1	0	1			hsa-miR-629*	0
UUCUGC	1	0	1	1	0	1			hsa-miR-544	mir-544
UUCUUG	1	0	1	1	0	1			hsa-miR-578	mir-578
UUGACA	2	0	2	1	0	1			hsa-miR-514 hsa-miR-514b-3p	mir-506
UUGAGG	1	1	0	1	1	0	hsa-miR-1304	mir-1304
UUGGCA	3	3	0	3	3	0	hsa-miR-96 hsa-miR-182 hsa-miR-1271	mir-96 mir-182 mir-1271
UUGGGA	2	2	0	2	2	0	hsa-miR-3122 hsa-miR-3913	0 mir-3913
UUGGGG	1	1	0	1	1	0	hsa-miR-4260	0
UUGGUC	2	0	2	1	0	1			hsa-miR-133a hsa-miR-133b	mir-133
UUGGUU	1	0	1	1	0	1			hsa-miR-659	0
UUGUAG	1	1	0	1	1	0	hsa-miR-3674	0
UUGUAU	1	0	1	1	0	1			hsa-miR-3149	0
UUGUCC	1	0	1	1	0	1			hsa-miR-2355-3p	mir-2355
UUGUGA	1	0	1	1	0	1			hsa-miR-758	mir-379
UUGUGU	1	0	1	1	0	1			hsa-miR-599	mir-599
UUGUUC	1	0	1	1	0	1			hsa-miR-375	mir-375
UUUCAA	1	0	1	1	0	1			hsa-miR-1305	mir-1305
UUUCAG	3	0	3	1	0	1			hsa-miR-30a* hsa-miR-30d* hsa-miR-30e*	mir-30
UUUGCA	4	1	3	4	1	3	hsa-miR-450b-5p	mir-450	hsa-miR-507 hsa-miR-557 hsa-miR-3680*	mir-506 mir-557 0
UUUGCG	1	1	0	1	1	0	hsa-miR-450a	mir-450
UUUGUG	1	0	1	1	0	1			hsa-miR-2113	0
UUUUCA	1	0	1	1	0	1			hsa-miR-335*	mir-335
UUUUUG	1	1	0	1	1	0	hsa-miR-129-5p	mir-129
